# Supplementary material for: Co-culture of the fungus Fusarium tricinctum with Streptomyces lividans induces production of cryptic naphthoquinone dimers
Source: PubMed Central journal article supplement — RSC Adv. 2019 Jan 11;9(3):1491–500. doi: 10.1039/c8ra09067j (PMC9060880; doi:10.1039/c8ra09067j), 2019-01-11
Supplement: RA-009-C8RA09067J-s001.pdf [file RA-009-C8RA09067J-s001.pdf]

## Supplementary information

### Co-Culture of the Fungus *Fusarium tricinctum* with *Streptomyces lividans* Induces Production of Cryptic Naphthoquinone Dimers

Mariam Moussa,<sup>a</sup> Weaam Ebrahim,<sup>a,b</sup> Michele Bonus,<sup>c</sup> Holger Gohlke,<sup>c,d</sup> Attila Mándi,<sup>e</sup> Tibor Kurtán,<sup>e</sup> Rudolf Hartmann,<sup>f</sup> Rainer Kalscheuer,<sup>a</sup> Wenhan Lin,<sup>g</sup> Zhen Liu,<sup>a,\*</sup> and Peter Proksch<sup>a,\*</sup>

<sup>a</sup>*Institute of Pharmaceutical Biology and Biotechnology, Heinrich-Heine-Universität Düsseldorf, Universitätsstrasse 1, 40225 Düsseldorf, Germany. E-mail: zhenfeizi0@sina.com(Z.L.), proksch@uni-duesseldorf.de(P. P.)*

<sup>b</sup>*Department of Pharmacognosy, Faculty of Pharmacy, Mansoura University, Mansoura 35516, Egypt*

<sup>c</sup>*Institute of Pharmaceutical and Medicinal Chemistry, Heinrich-Heine-Universität Düsseldorf, Universitätsstrasse 1, 40225 Düsseldorf, Germany*

<sup>d</sup>*John von Neumann Institute for Computing (NIC), Jülich Supercomputing Centre (JSC), and Institute for Complex Systems - Structural Biochemistry (ICS-6), Forschungszentrum Jülich GmbH, Wilhelm-Johnen-Straße, 52425 Jülich, Germany.*

<sup>e</sup>*Department of Organic Chemistry, University of Debrecen, Egyetem tér 1, Debrecen 4032, Hungary*

<sup>f</sup>*Institute of Complex Systems - Structural Biochemistry, Forschungszentrum Jülich GmbH, Wilhelm-Johnen-Straße, 52428 Jülich, Germany*

<sup>g</sup>*State Key Laboratory of Natural and Biomimetic Drugs, Peking University, Beijing 100191, China*

## Table of Contents

|                                                                                                              |    |
|--------------------------------------------------------------------------------------------------------------|----|
| S1. UV spectrum of compound 1.....                                                                           | 3  |
| S2. HRESIMS of compound 1.....                                                                               | 4  |
| S3. <sup>1</sup> H NMR (600 MHz, CDCl <sub>3</sub> -CD <sub>3</sub> OD 2:1) spectrum of compound 1.....      | 5  |
| S4. <sup>13</sup> C NMR (150 MHz, CDCl <sub>3</sub> -CD <sub>3</sub> OD 2:1) spectrum of compound 1.....     | 6  |
| S5. HSQC (600 and 150MHz, CDCl <sub>3</sub> -CD <sub>3</sub> OD 2:1) spectrum of compound 1.....             | 7  |
| S6. HMBC (600 and 150 MHz, CDCl <sub>3</sub> -CD <sub>3</sub> OD 2:1) spectrum of compound 1.....            | 8  |
| S7. Long-range HMBC (600 and 150 MHz, CDCl <sub>3</sub> -CD <sub>3</sub> OD 2:1) spectrum of compound 1..... | 9  |
| S8. UV spectrum of compound 2.....                                                                           | 10 |
| S9. HRESIMS of compound 2.....                                                                               | 11 |
| S10. <sup>1</sup> H NMR (600 MHz, CDCl <sub>3</sub> ) spectrum of compound 2.....                            | 12 |
| S11. HSQC (600 and 150 MHz, CDCl <sub>3</sub> ) spectrum of compound 2.....                                  | 13 |
| S12. HMBC (600 and 150 MHz, CDCl <sub>3</sub> ) spectrum of compound 2.....                                  | 14 |
| S13. UV spectrum of compound 3.....                                                                          | 15 |
| S14. HRESIMS of compound 3.....                                                                              | 16 |
| S15. <sup>1</sup> H NMR (600 MHz, CDCl <sub>3</sub> ) spectrum of compound 3.....                            | 17 |
| S16. HSQC (600 and 150 MHz, CDCl <sub>3</sub> ) spectrum of compound 3.....                                  | 18 |
| S17. HMBC (600 and 150 MHz, CDCl <sub>3</sub> ) spectrum of compound 3.....                                  | 19 |
| S18. UV spectrum of compound 4.....                                                                          | 20 |
| S19. HRESIMS of compound 4.....                                                                              | 21 |
| S20. <sup>1</sup> H NMR (600 MHz, DMSO- <i>d</i> <sub>6</sub> ) spectrum of compound 4.....                  | 22 |
| S21. HSQC (600 and 150 MHz, DMSO- <i>d</i> <sub>6</sub> ) spectrum of compound 4.....                        | 23 |
| S22. HMBC (600 and 150 MHz, DMSO- <i>d</i> <sub>6</sub> ) spectrum of compound 4.....                        | 24 |
| S23. ROESY (600 and 150 MHz, DMSO- <i>d</i> <sub>6</sub> ) spectrum of compound 4.....                       | 25 |
| S24. UV spectrum of compound 5.....                                                                          | 26 |
| S25. HRESIMS of compound 5.....                                                                              | 27 |
| S26. <sup>1</sup> H NMR (750 MHz, acetone- <i>d</i> <sub>6</sub> ) spectrum of compound 5.....               | 28 |
| S27. HSQC (750 and 175 MHz, acetone- <i>d</i> <sub>6</sub> ) spectrum of compound 5.....                     | 29 |
| S28. HMBC (750 and 175 MHz, acetone- <i>d</i> <sub>6</sub> ) spectrum of compound 5.....                     | 30 |

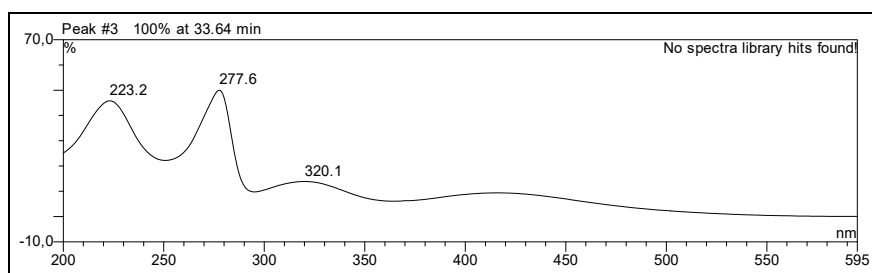

**S1.** UV spectrum of compound **1**.

## Mass Spectrum SmartFormula Report

### Analysis Info

Analysis Name D:\Data\spektren2016\Proksch16HR000151.d  
Method tune\_low\_new.m  
Sample Name M. Moussa 3M4S4 (CH3OH)  
Comment

Acquisition Date 6/21/2016 3:26:22 PM

Operator Peter Tommes  
Instrument maXis 288882.20213

### Acquisition Parameter

|             |            |                       |           |                  |           |
|-------------|------------|-----------------------|-----------|------------------|-----------|
| Source Type | ESI        | Ion Polarity          | Positive  | Set Nebulizer    | 0.3 Bar   |
| Focus       | Not active | Set Capillary         | 4000 V    | Set Dry Heater   | 180 °C    |
| Scan Begin  | 50 m/z     | Set End Plate Offset  | -500 V    | Set Dry Gas      | 4.0 l/min |
| Scan End    | 1500 m/z   | Set Collision Cell RF | 600.0 Vpp | Set Divert Valve | Source    |

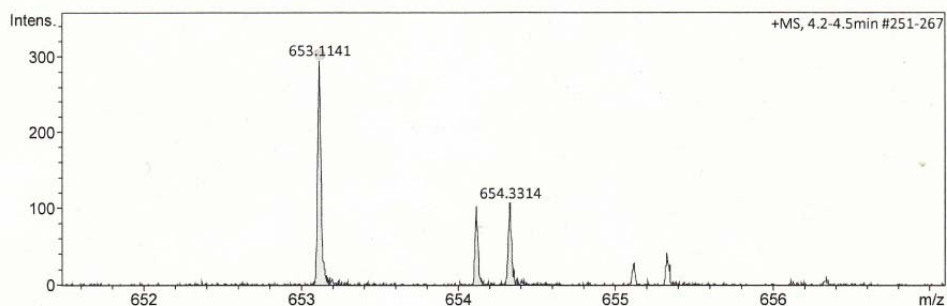

| Meas. m/z | # | Ion Formula | m/z      | err [ppm] | mSigma | # mSigma | Score  | rdb  | e <sup>-</sup> Conf | N-Rule |
|-----------|---|-------------|----------|-----------|--------|----------|--------|------|---------------------|--------|
| 653.1141  | 1 | C29H13N14O6 | 653.1137 | -0.6      | 40.4   | 1        | 100.00 | 30.5 | even                | ok     |
|           | 2 | C30H9N18O2  | 653.1150 | 1.4       | 44.4   | 2        | 68.59  | 35.5 | even                | ok     |
|           | 3 | C31H25O16   | 653.1137 | -0.6      | 46.2   | 3        | 85.29  | 19.5 | even                | ok     |

## S2. HRESIMS of compound 1.

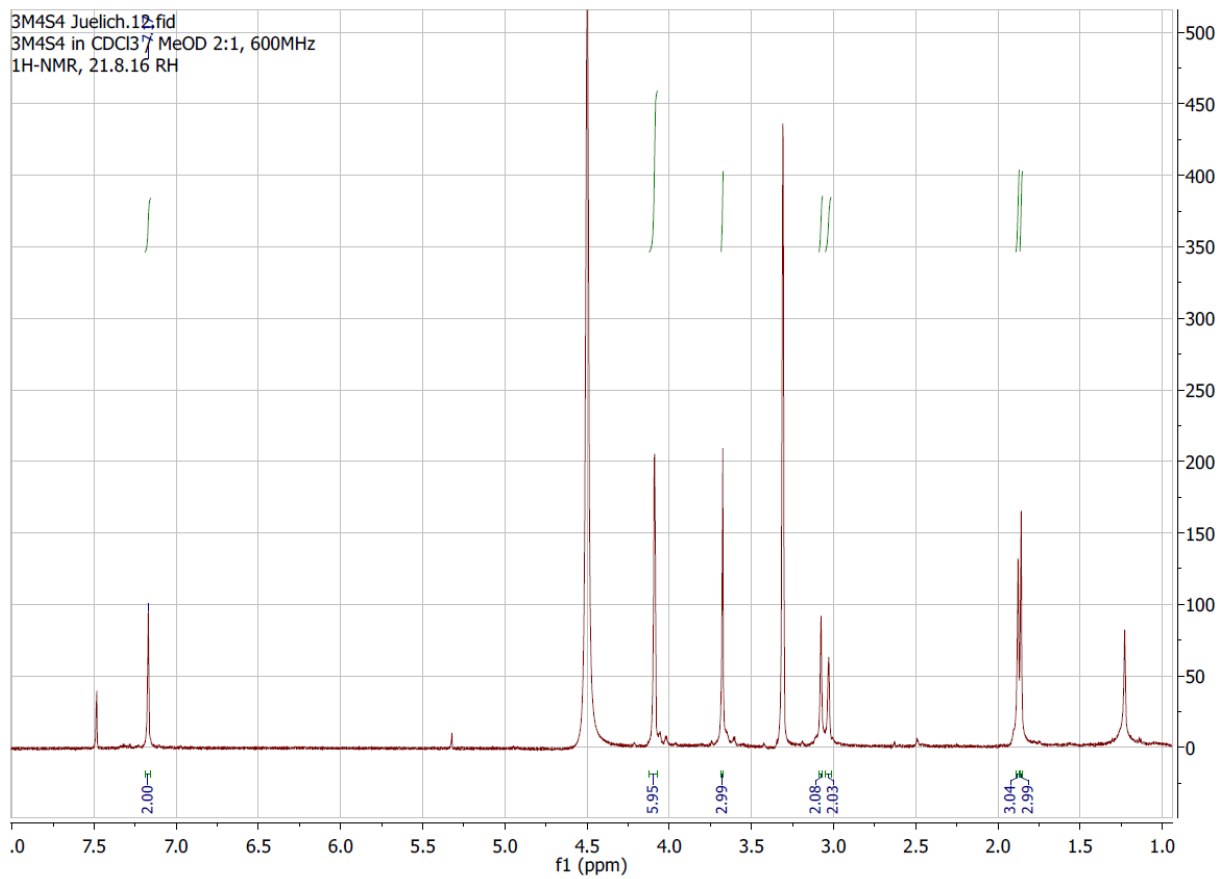

S3. <sup>1</sup>H NMR (600 MHz, CDCl<sub>3</sub>-CD<sub>3</sub>OD 2:1) spectrum of compound **1**.

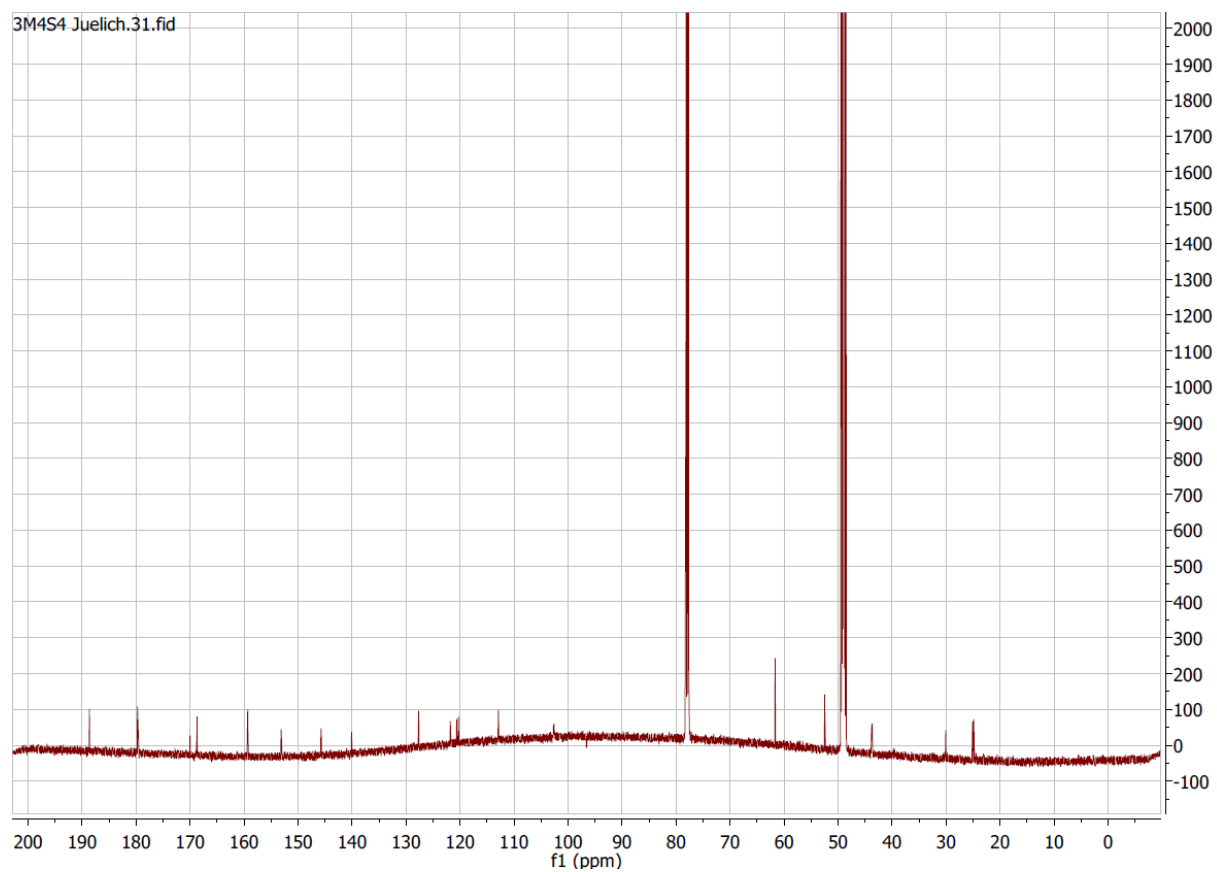

**S4.**  $^{13}\text{C}$  NMR (150 MHz,  $\text{CDCl}_3\text{-CD}_3\text{OD}$  2:1) spectrum of compound **1**.

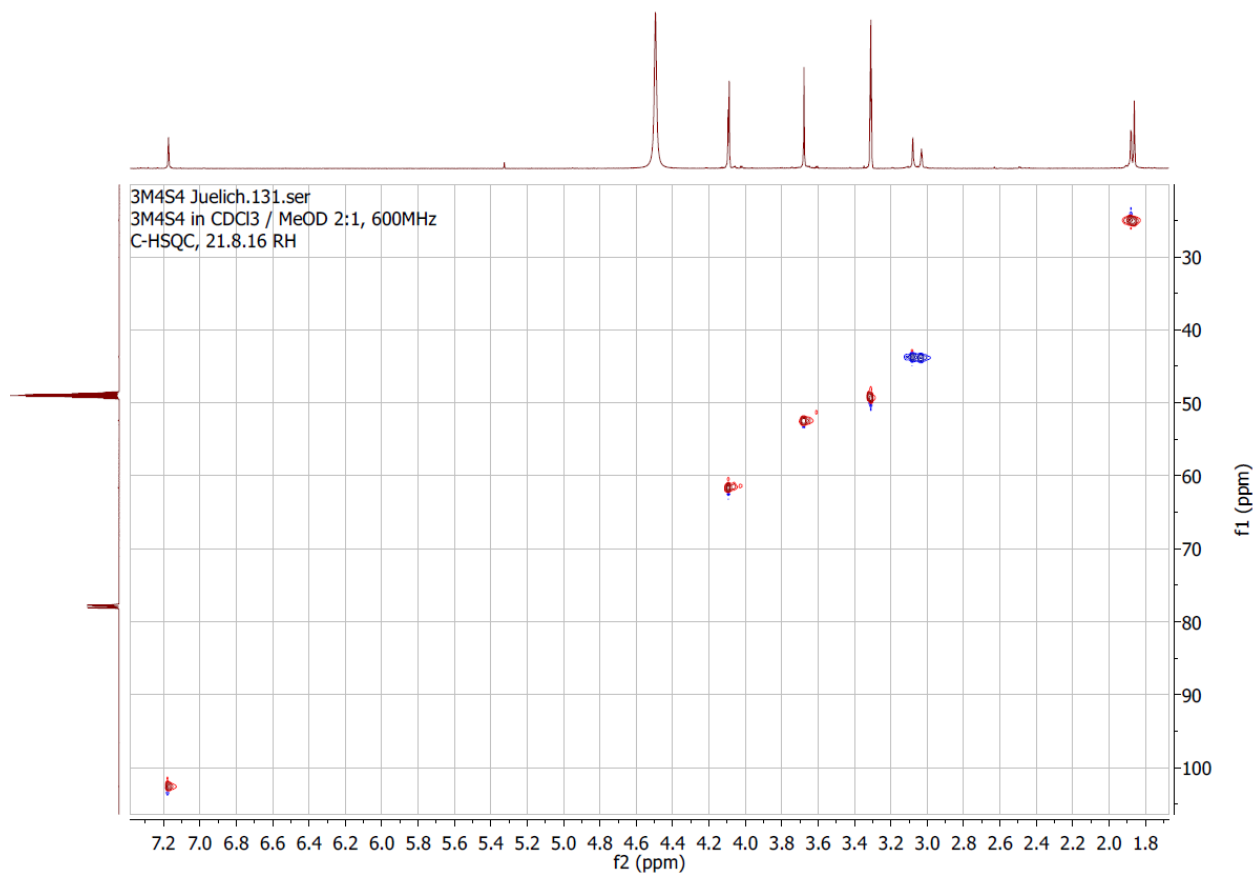

S5. HSQC (600 and 150MHz,  $\text{CDCl}_3$ - $\text{CD}_3\text{OD}$  2:1) spectrum of compound **1**.

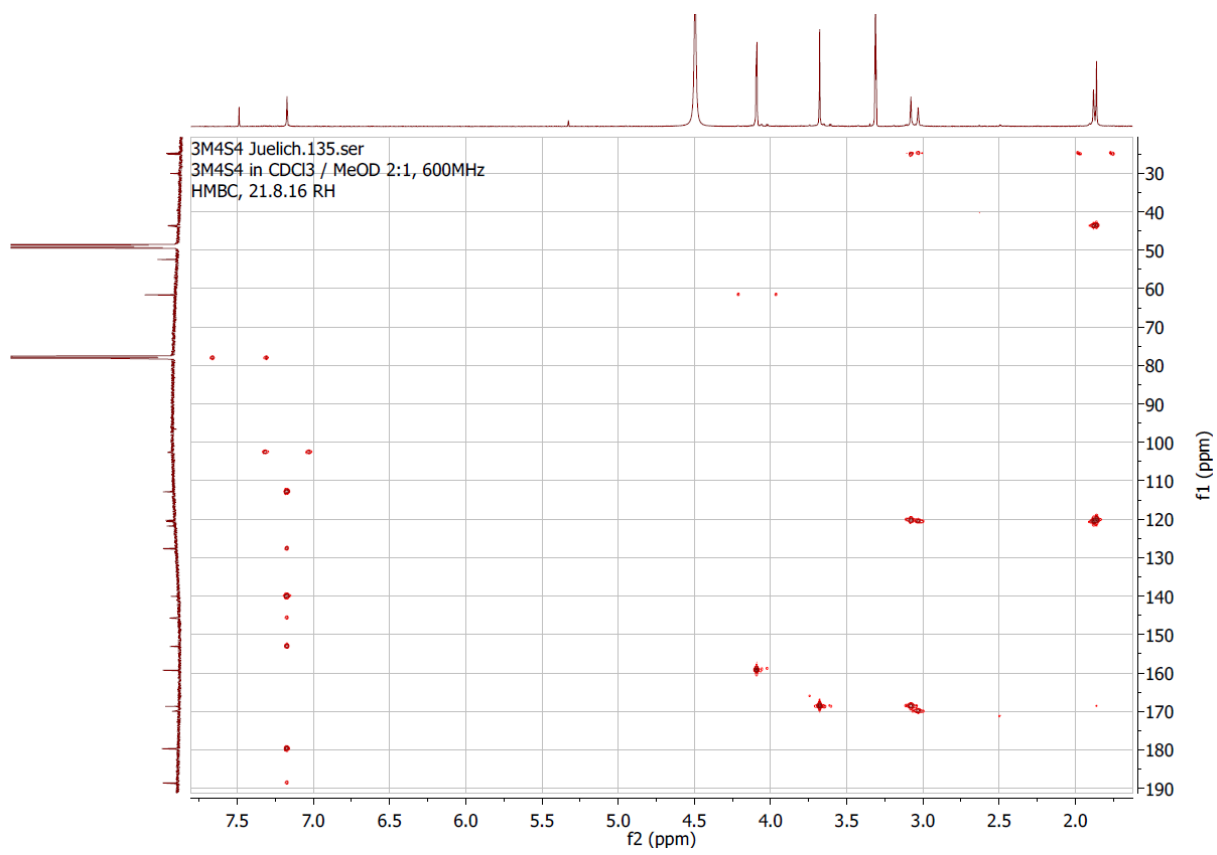

**S6.** HMBC (600 and 150 MHz, CDCl<sub>3</sub>-CD<sub>3</sub>OD 2:1) spectrum of compound **1**.



3M4S4 in CDCl<sub>3</sub> / MeOD, 10deg, 600MHz  
HMBC, 10.8.17 RH

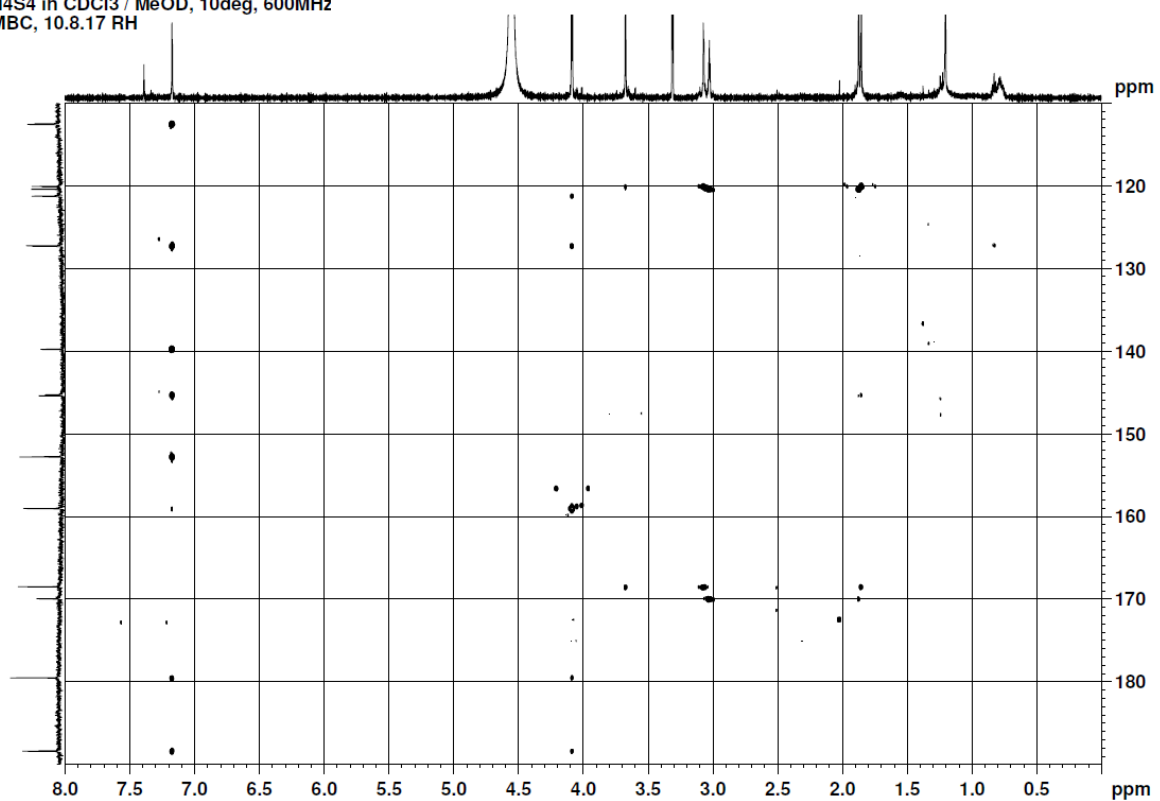

S7. Long-range HMBC (600 and 150 MHz, CDCl<sub>3</sub>-CD<sub>3</sub>OD 2:1) spectrum of compound **1**.

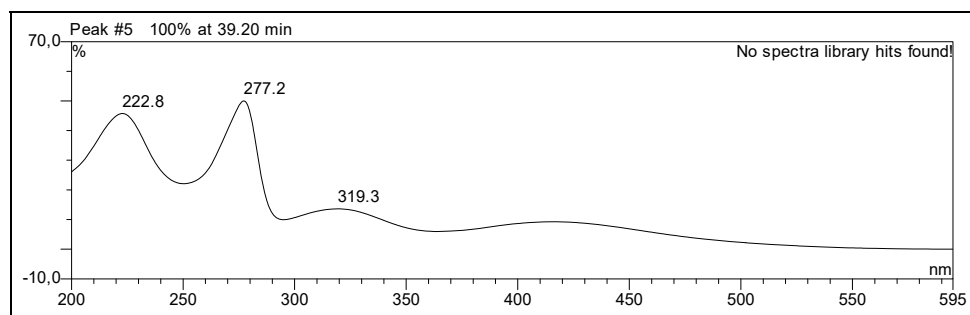

**S8.** UV spectrum of compound **2**.

## Mass Spectrum SmartFormula Report

### Analysis Info

Analysis Name D:\Data\spektren2016\Proksch16HR000294.d  
Method tune\_low\_new.m  
Sample Name Moussa 3M8SP10 (CH3OH)  
Comment

Acquisition Date 12/8/2016 2:36:47 PM

Operator Peter Tommes  
Instrument maXis 288882.20213

### Acquisition Parameter

|             |            |                       |           |                  |           |
|-------------|------------|-----------------------|-----------|------------------|-----------|
| Source Type | ESI        | Ion Polarity          | Positive  | Set Nebulizer    | 0.3 Bar   |
| Focus       | Not active | Set Capillary         | 4000 V    | Set Dry Heater   | 180 °C    |
| Scan Begin  | 50 m/z     | Set End Plate Offset  | -500 V    | Set Dry Gas      | 4.0 l/min |
| Scan End    | 1500 m/z   | Set Collision Cell RF | 600.0 Vpp | Set Divert Valve | Source    |

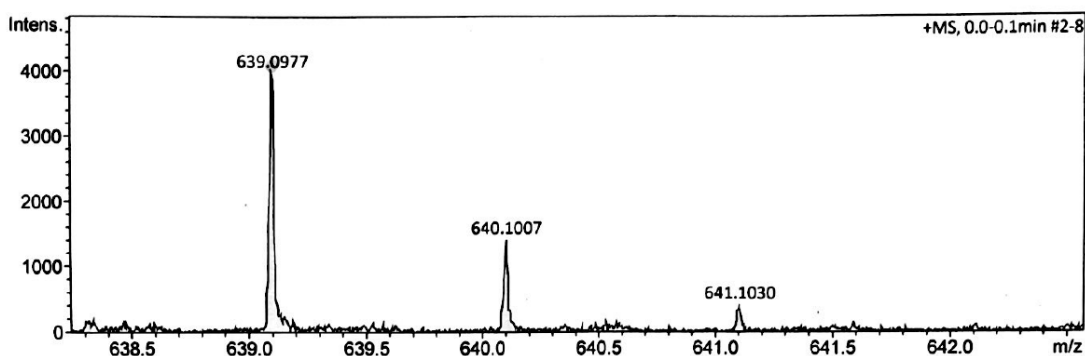

| Meas. m/z | # | Ion Formula | m/z      | err [ppm] | mSigma | # mSigma | Score  | rdb  | e <sup>-</sup> Conf | N-Rule |
|-----------|---|-------------|----------|-----------|--------|----------|--------|------|---------------------|--------|
| 639.0977  | 1 | C28H11N14O6 | 639.0981 | 0.6       | 16.7   | 1        | 100.00 | 30.5 | even                | ok     |
|           | 2 | C30H23O16   | 639.0981 | 0.6       | 17.3   | 2        | 98.34  | 19.5 | even                | ok     |

S9. HRESIMS of compound 2.

MoussaMariam.520.fid  
3M8-SP10

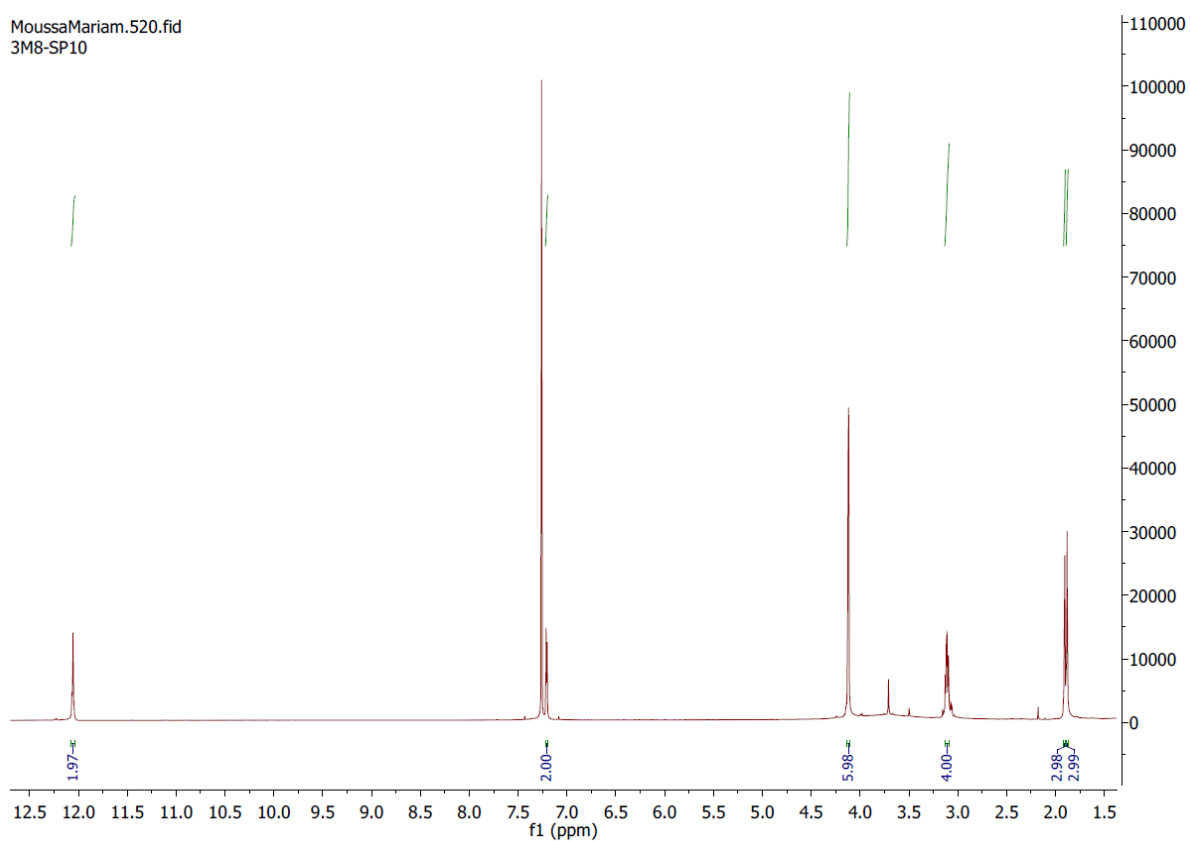

**S10.** <sup>1</sup>H NMR (600 MHz, CDCl<sub>3</sub>) spectrum of compound **2**.

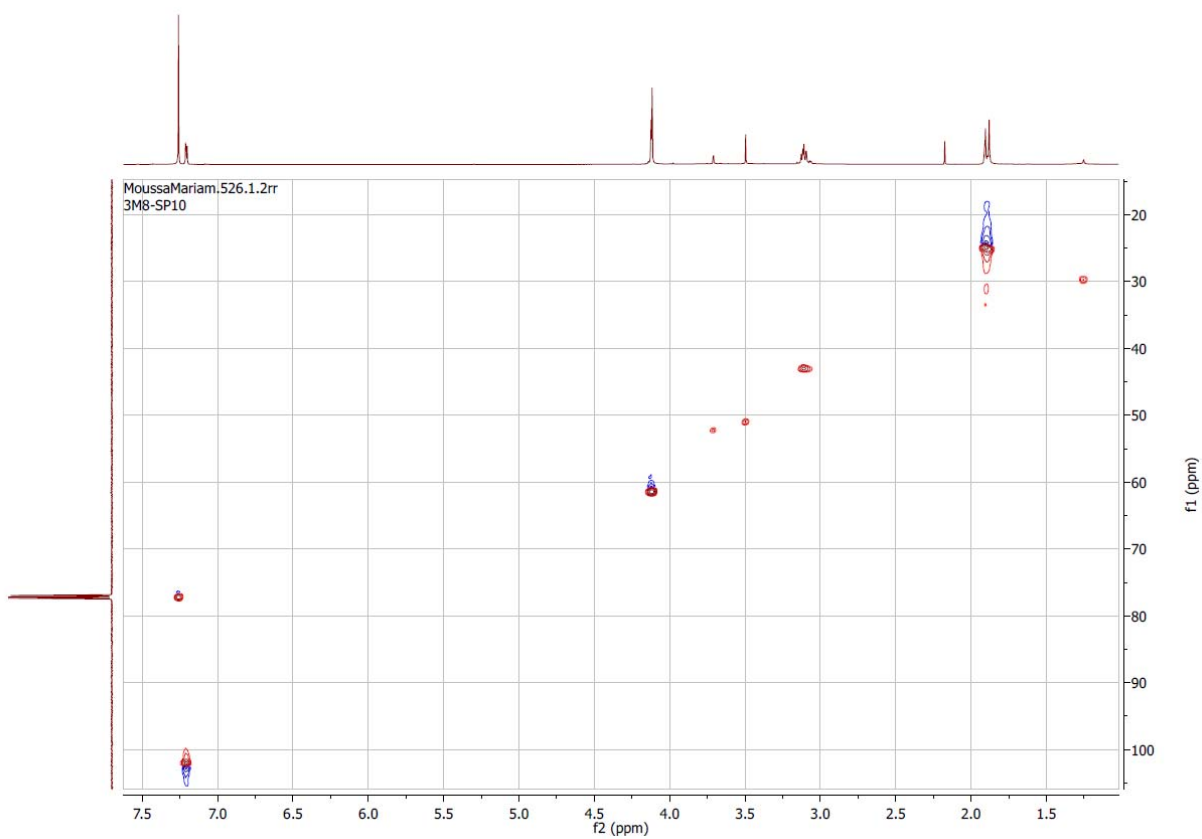

**S11.** HSQC (600 and 150 MHz,  $\text{CDCl}_3$ ) spectrum of compound **2**.

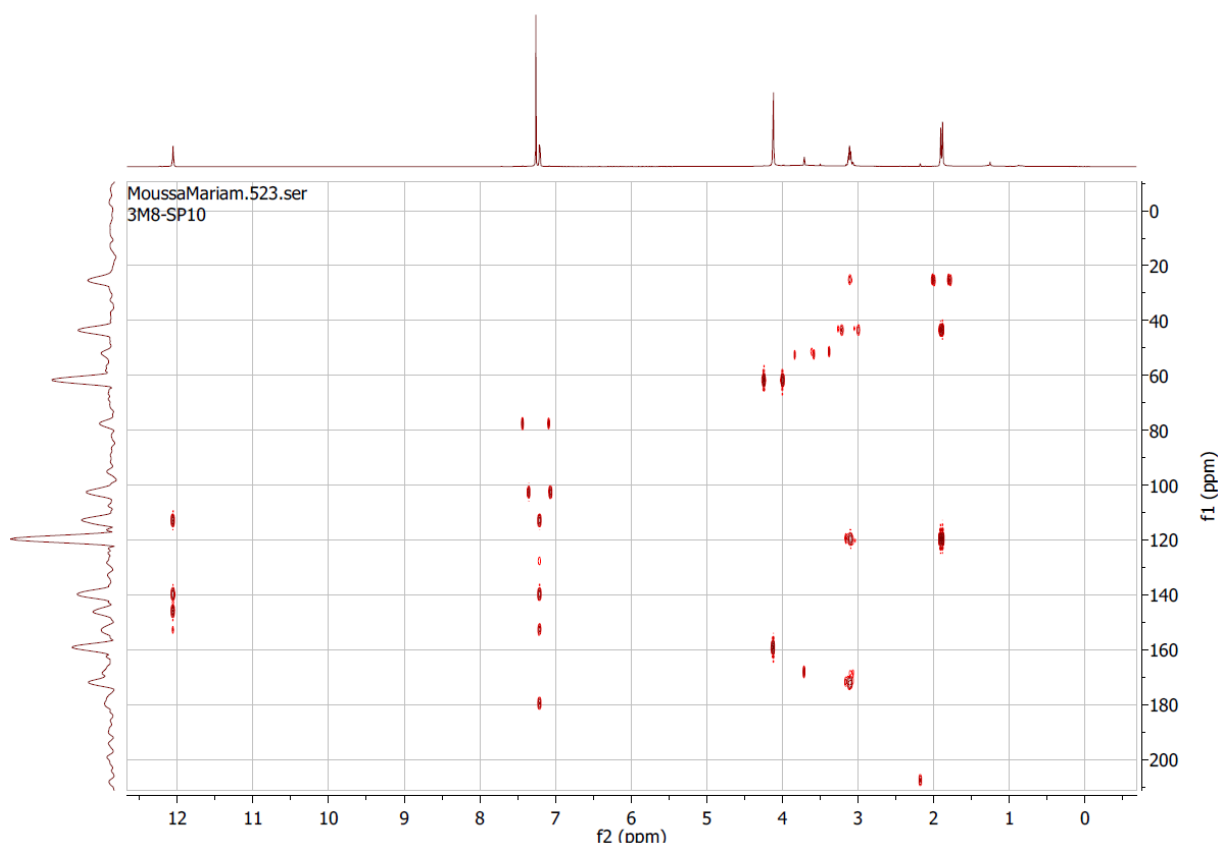

**S12.** HMBC (600 and 150 MHz,  $\text{CDCl}_3$ ) spectrum of compound **2**.

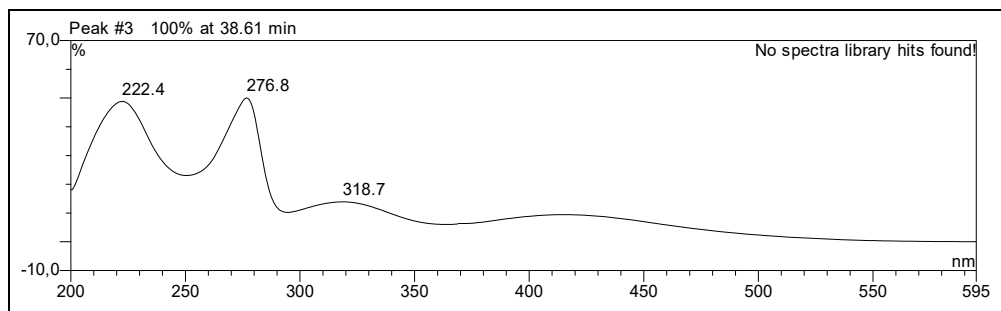

**S13.** UV spectrum of compound **3**.

## Mass Spectrum SmartFormula Report

### Analysis Info

Analysis Name D:\Data\spektren2016\Proksch16HR000232.d  
 Method tune\_low\_new.m  
 Sample Name M. Moussa SiOSP6 (CH3OH)  
 Comment 1 ug/ml

Acquisition Date 9/13/2016 3:14:11 PM

Operator Peter Tommes  
 Instrument maXis 288882.20213

### Acquisition Parameter

|             |            |                       |           |                  |           |
|-------------|------------|-----------------------|-----------|------------------|-----------|
| Source Type | ESI        | Ion Polarity          | Positive  | Set Nebulizer    | 0.3 Bar   |
| Focus       | Not active | Set Capillary         | 4000 V    | Set Dry Heater   | 180 °C    |
| Scan Begin  | 50 m/z     | Set End Plate Offset  | -500 V    | Set Dry Gas      | 4.0 l/min |
| Scan End    | 1500 m/z   | Set Collision Cell RF | 600.0 Vpp | Set Divert Valve | Source    |

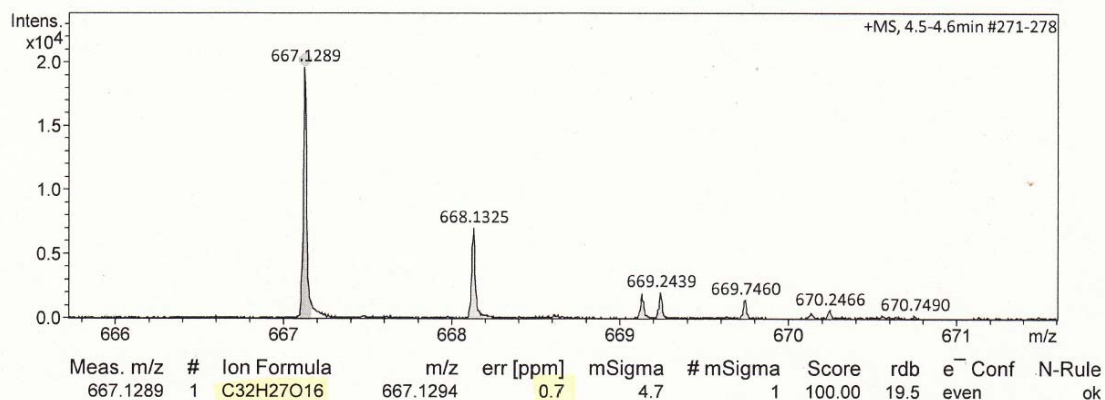

**S14. HRESIMS of compound 3.**



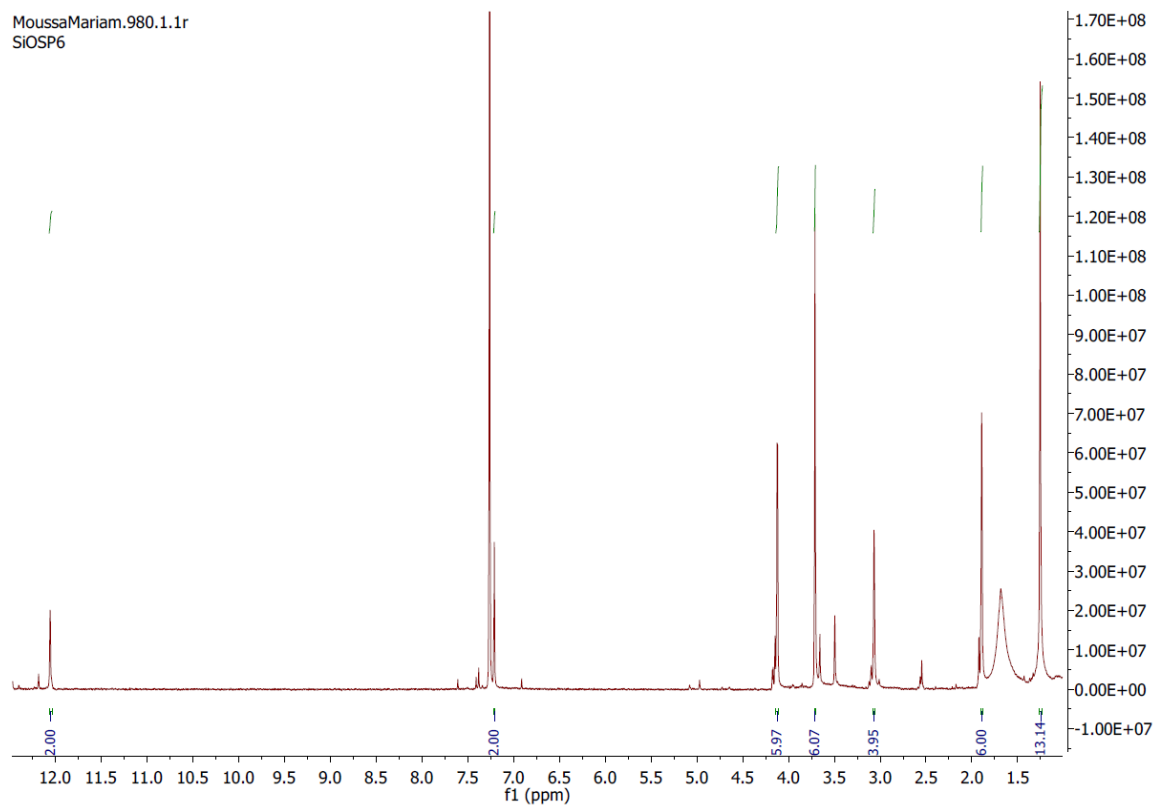

**S15.**  $^1\text{H}$  NMR (600 MHz,  $\text{CDCl}_3$ ) spectrum of compound **3**.

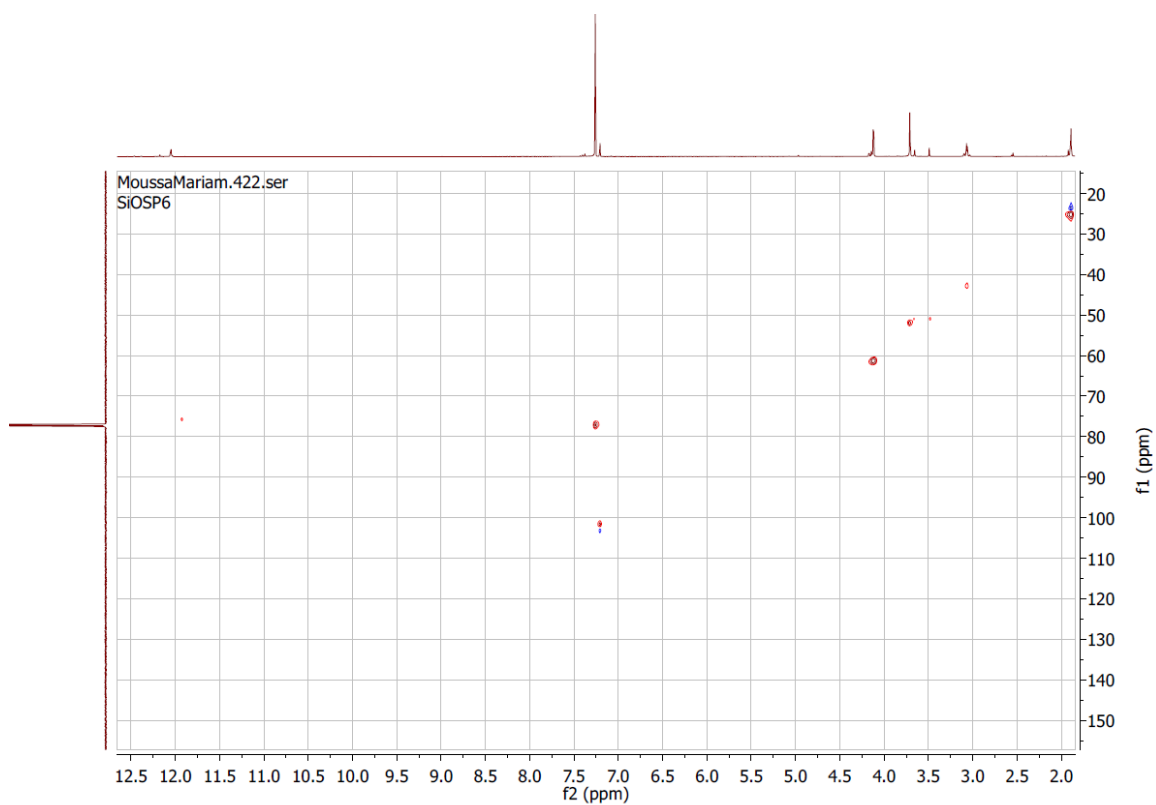

**S16.** HSQC (600 and 150 MHz,  $\text{CDCl}_3$ ) spectrum of compound **3**.

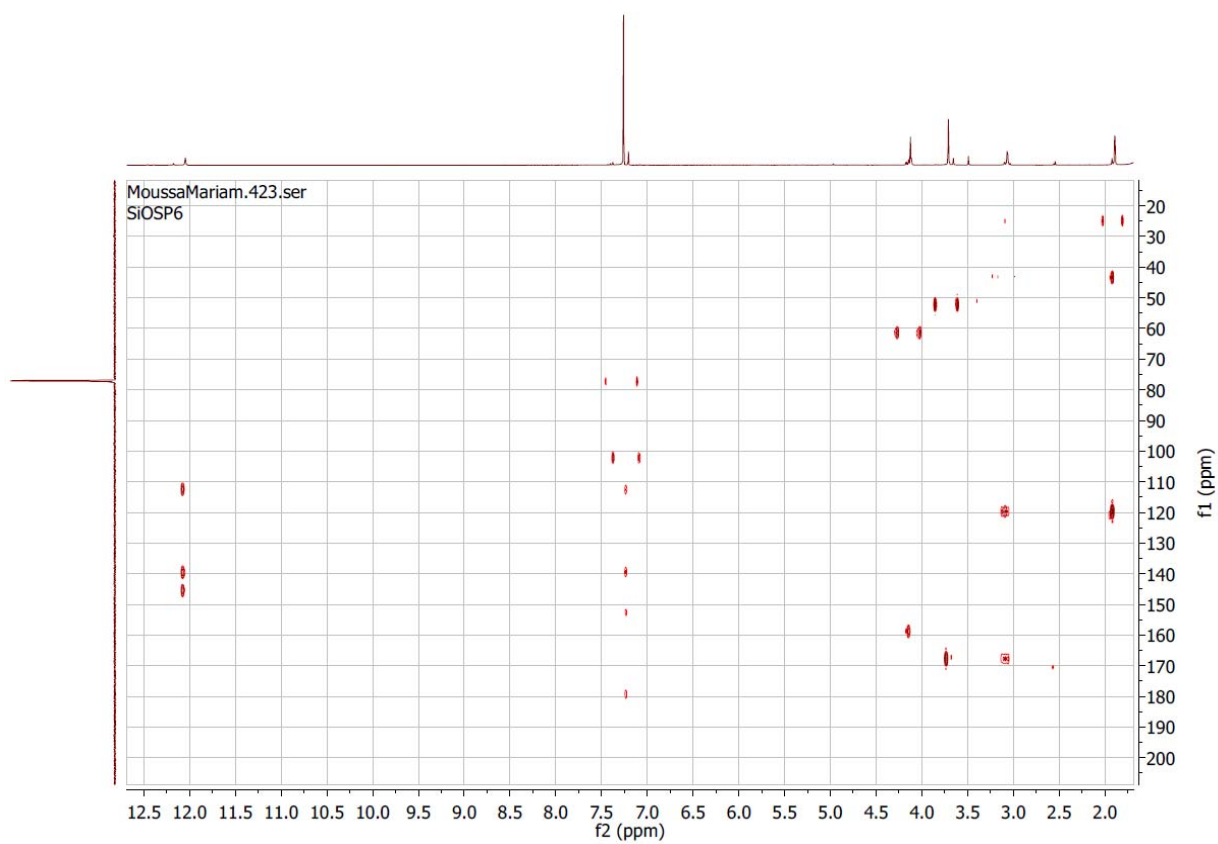

**S17.** HMBC (600 and 150 MHz,  $\text{CDCl}_3$ ) spectrum of compound **3**.

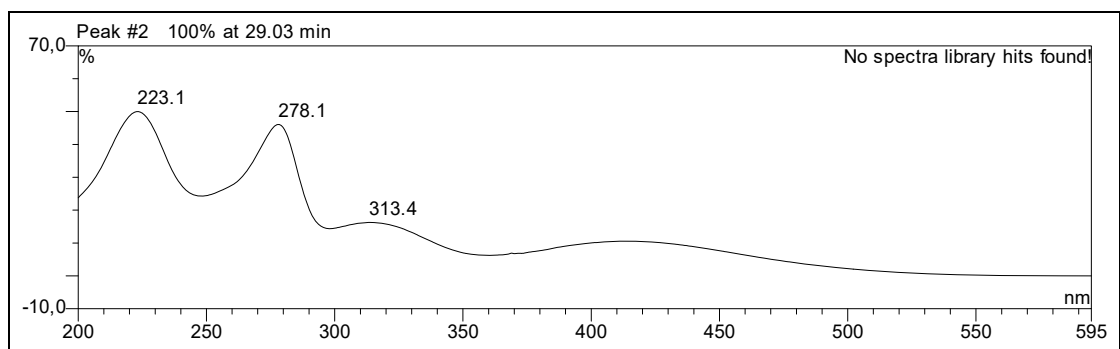

**S18.** UV spectrum of compound 4.

## Mass Spectrum SmartFormula Report

**Analysis Info**

Analysis Name D:\Data\spektren 2017\PRO17HR000091.d  
 Method tune\_low\_new.m  
 Sample Name Moussa 3M4S3SP1+2 in Aceton (CH3OH)  
 Comment

Acquisition Date 12/8/2017 2:58:35 PM

Operator Peter Tommes  
 Instrument maXis 288882.20213

**Acquisition Parameter**

|             |            |                       |           |                  |           |
|-------------|------------|-----------------------|-----------|------------------|-----------|
| Source Type | ESI        | Ion Polarity          | Positive  | Set Nebulizer    | 0.3 Bar   |
| Focus       | Not active | Set Capillary         | 4000 V    | Set Dry Heater   | 180 °C    |
| Scan Begin  | 50 m/z     | Set End Plate Offset  | -500 V    | Set Dry Gas      | 4.0 l/min |
| Scan End    | 1500 m/z   | Set Collision Cell RF | 600.0 Vpp | Set Divert Valve | Source    |

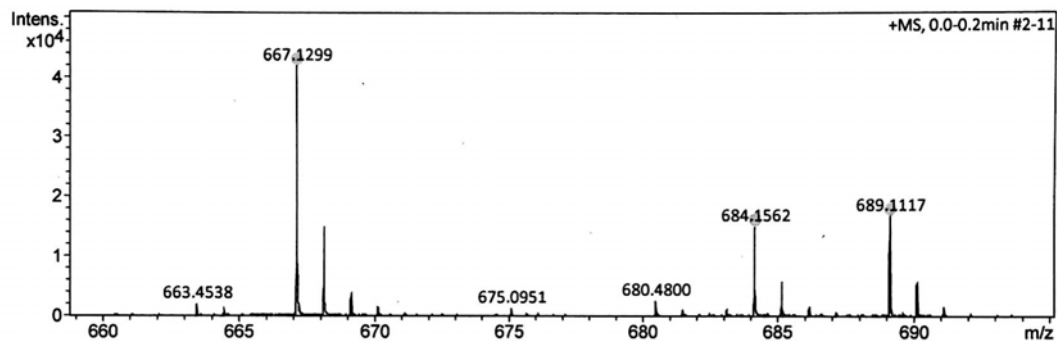

| Meas. m/z | # | Ion Formula | m/z      | err [ppm] | mSigma | # mSigma | Score  | rdb  | e <sup>-</sup> Conf | N-Rule |
|-----------|---|-------------|----------|-----------|--------|----------|--------|------|---------------------|--------|
| 667.1299  | 1 | C32H27O16   | 667.1294 | -0.9      | 9.0    | 1        | 100.00 | 19.5 | even                | ok     |

S19. HRESIMS of compound 4.

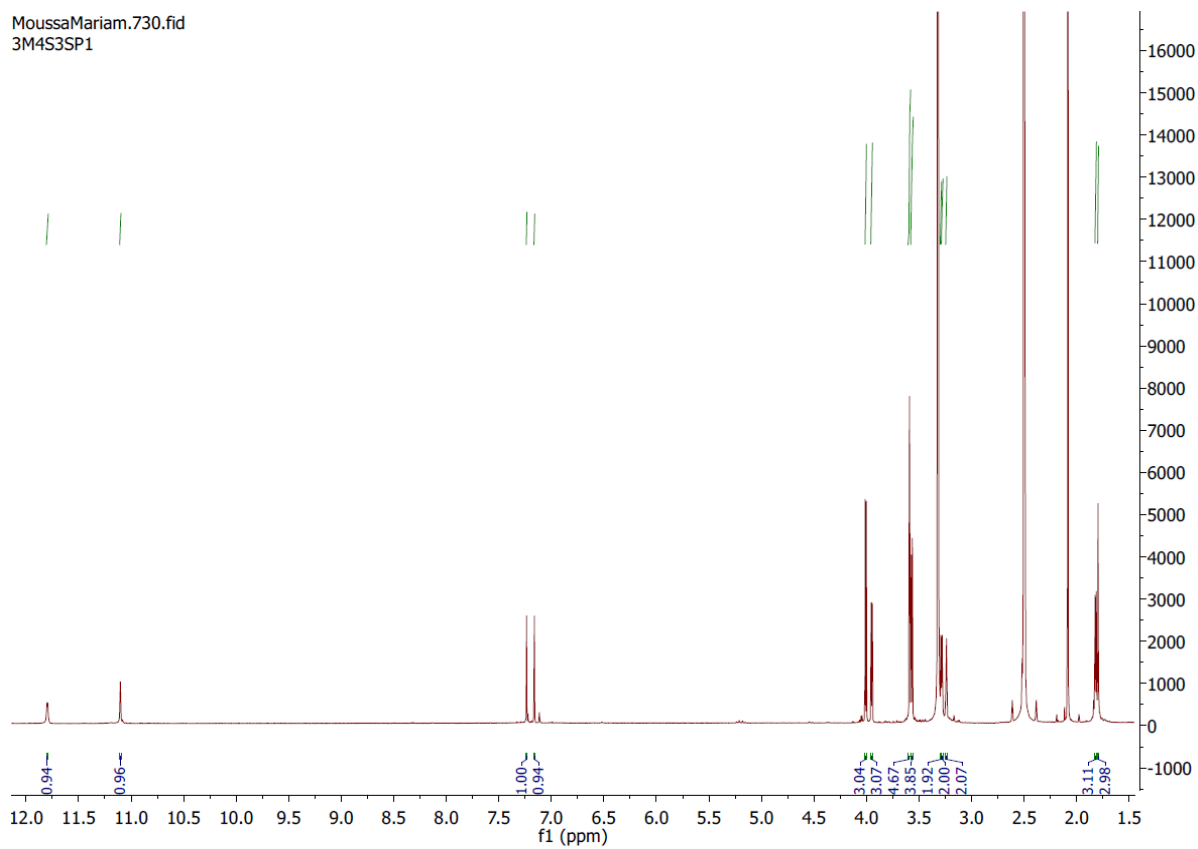

**S20.**  $^1\text{H}$  NMR (600 MHz,  $\text{DMSO}-d_6$ ) spectrum of compound **4**.

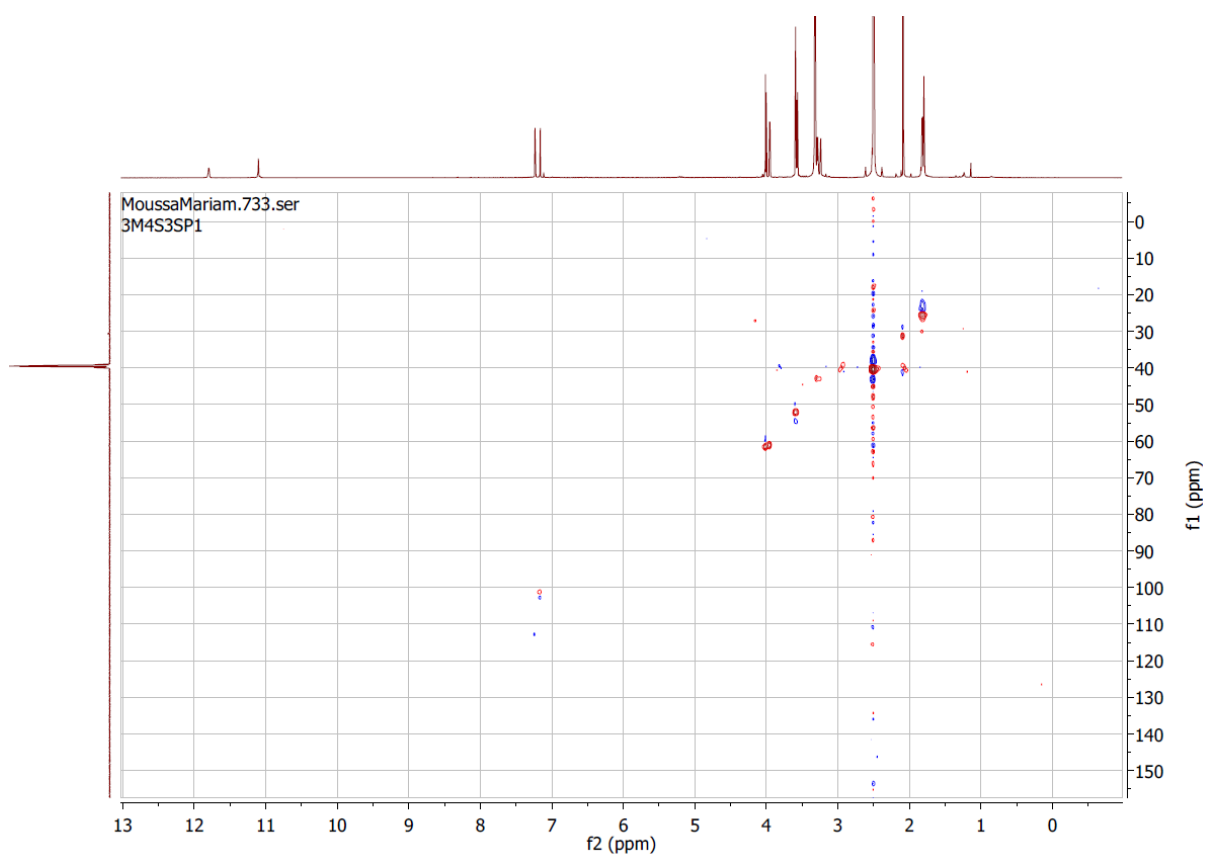

**S21.** HSQC (600 and 150 MHz, DMSO- $d_6$ ) spectrum of compound **4**.

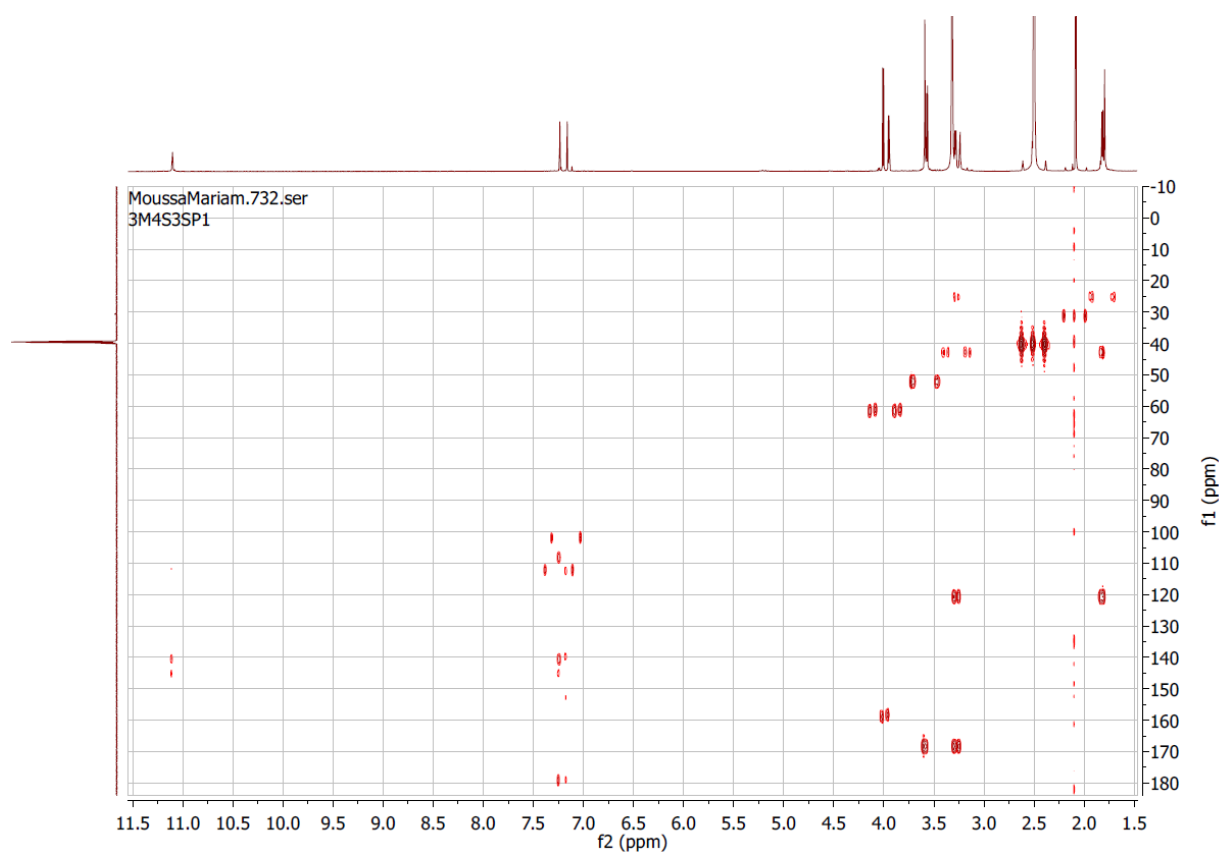

S22. HMBC (600 and 150 MHz, DMSO- $d_6$ ) spectrum of compound 4.



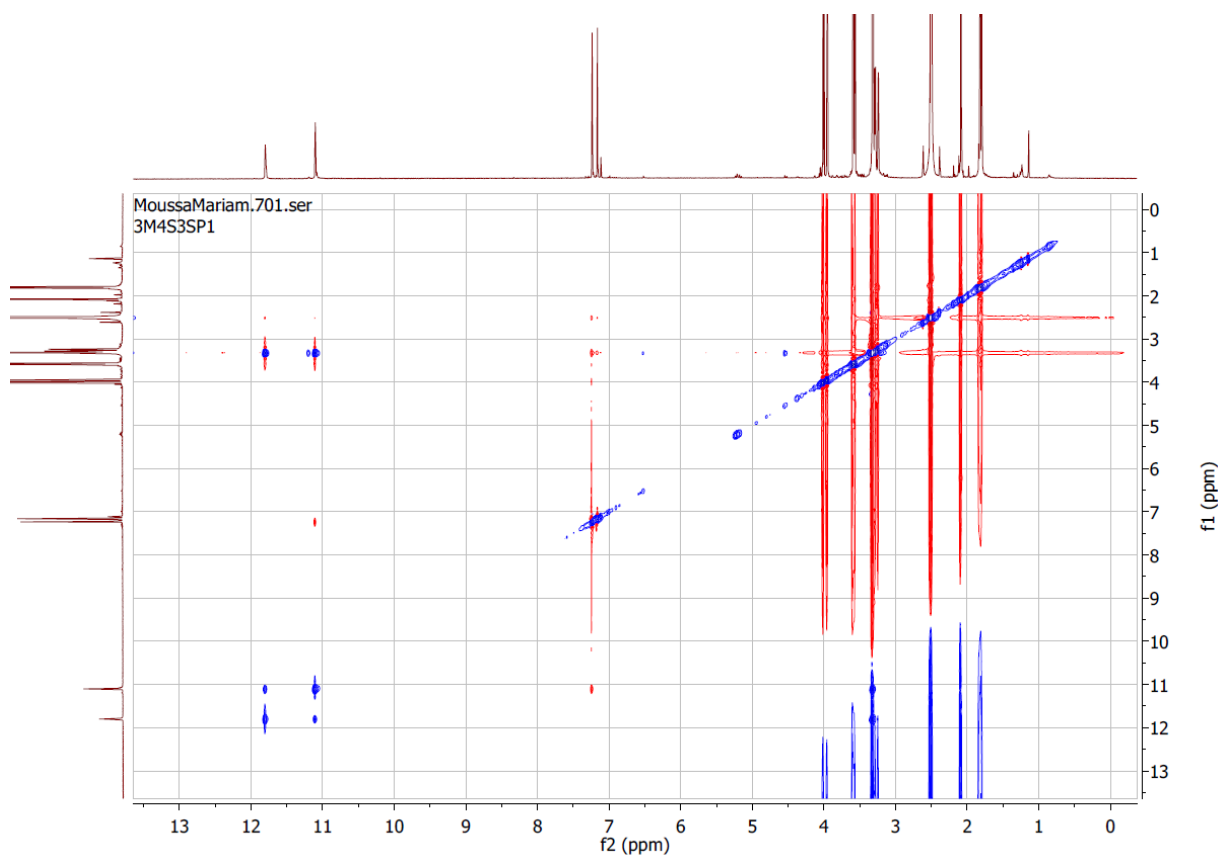

**S23.** ROESY (600 and 150 MHz, DMSO- $d_6$ ) spectrum of compound **4**.

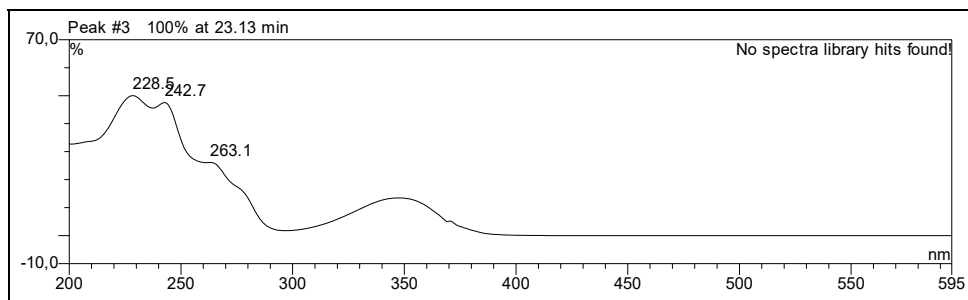

**S24.** UV spectrum of compound **5**.

## Mass Spectrum SmartFormula Report

### Analysis Info

Analysis Name D:\Data\spektren2016\Proksch16HR000128.d  
Method tune\_low\_new.m  
Sample Name Moussa 3M5SP1 (CH3OH)  
Comment

Acquisition Date 4/28/2016 1:15:53 PM

Operator Peter Tommes  
Instrument maXis 288882.20213

### Acquisition Parameter

|             |            |                       |           |                  |           |
|-------------|------------|-----------------------|-----------|------------------|-----------|
| Source Type | ESI        | Ion Polarity          | Positive  | Set Nebulizer    | 0.3 Bar   |
| Focus       | Not active | Set Capillary         | 4000 V    | Set Dry Heater   | 180 °C    |
| Scan Begin  | 50 m/z     | Set End Plate Offset  | -500 V    | Set Dry Gas      | 4.0 l/min |
| Scan End    | 1500 m/z   | Set Collision Cell RF | 600.0 Vpp | Set Divert Valve | Source    |

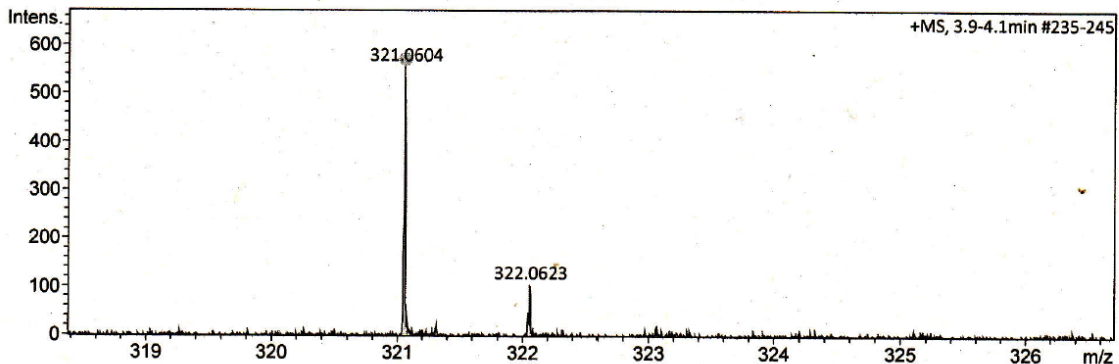

| Meas. m/z | # | Ion Formula | m/z      | err [ppm] | mSigma | # mSigma | Score  | rdb | e <sup>-</sup> Conf | N-Rule |
|-----------|---|-------------|----------|-----------|--------|----------|--------|-----|---------------------|--------|
| 321.0604  | 1 | C15H13O8    | 321.0605 | 0.3       | 22.1   | 1        | 100.00 | 9.5 | even                | ok     |

S25. HRESIMS of compound 5.

3M5SP1 Juelich.3.fid  
26.04.2017

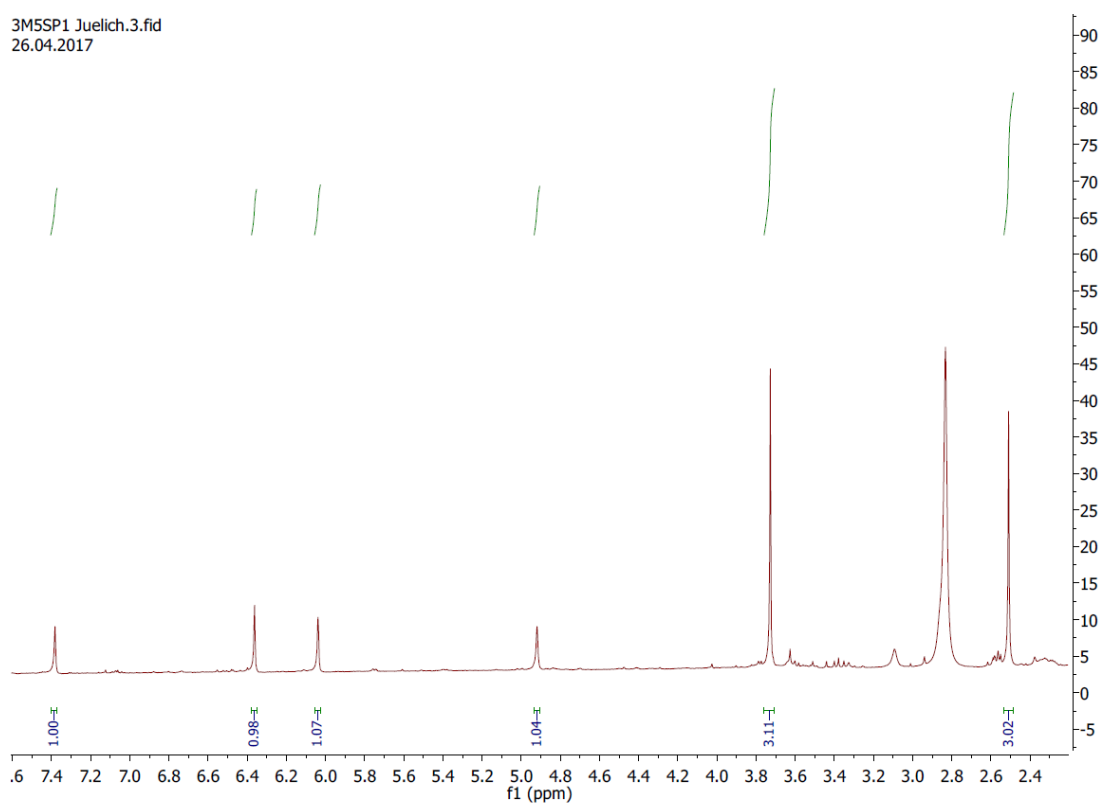

**S26.**  $^1\text{H}$  NMR (750 MHz, acetone- $d_6$ ) spectrum of compound **5**.

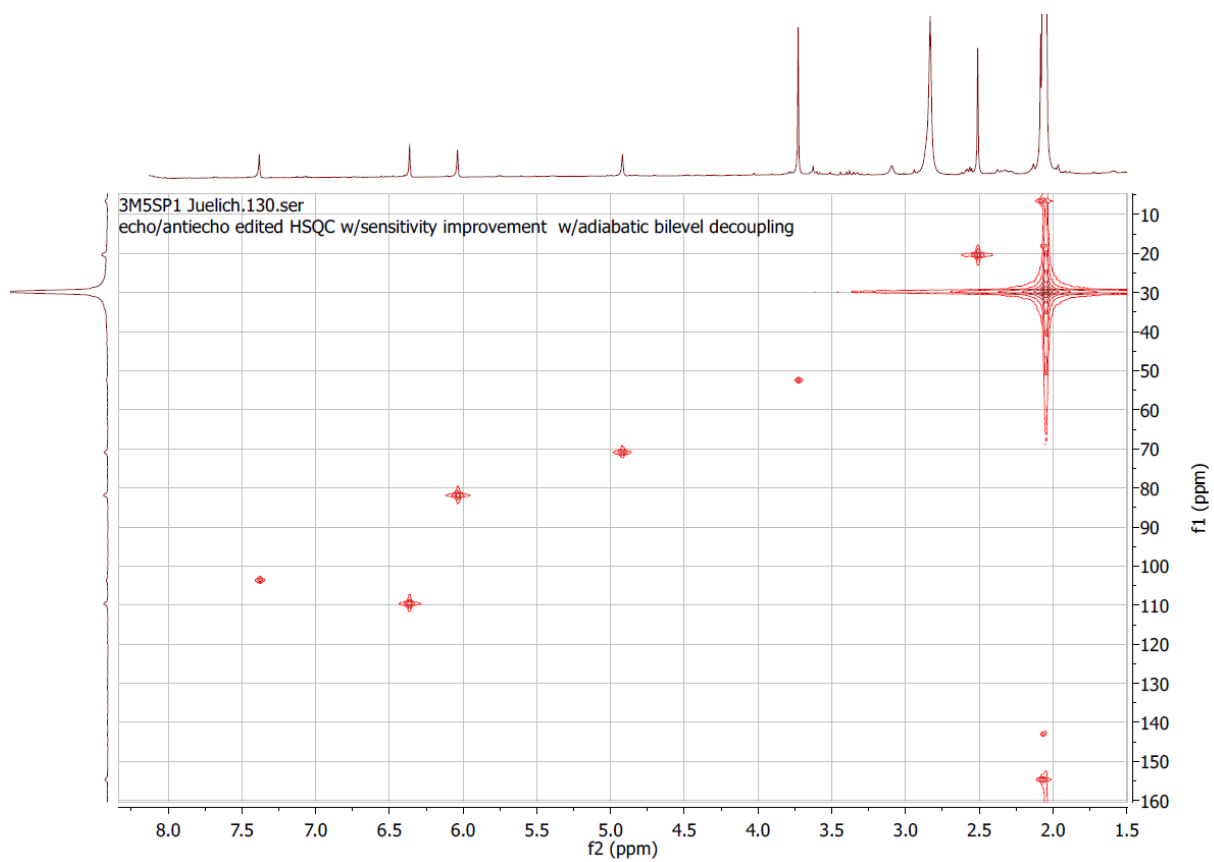

**S27.** HSQC (750 and 175 MHz, acetone- $d_6$ ) spectrum of compound **5**.

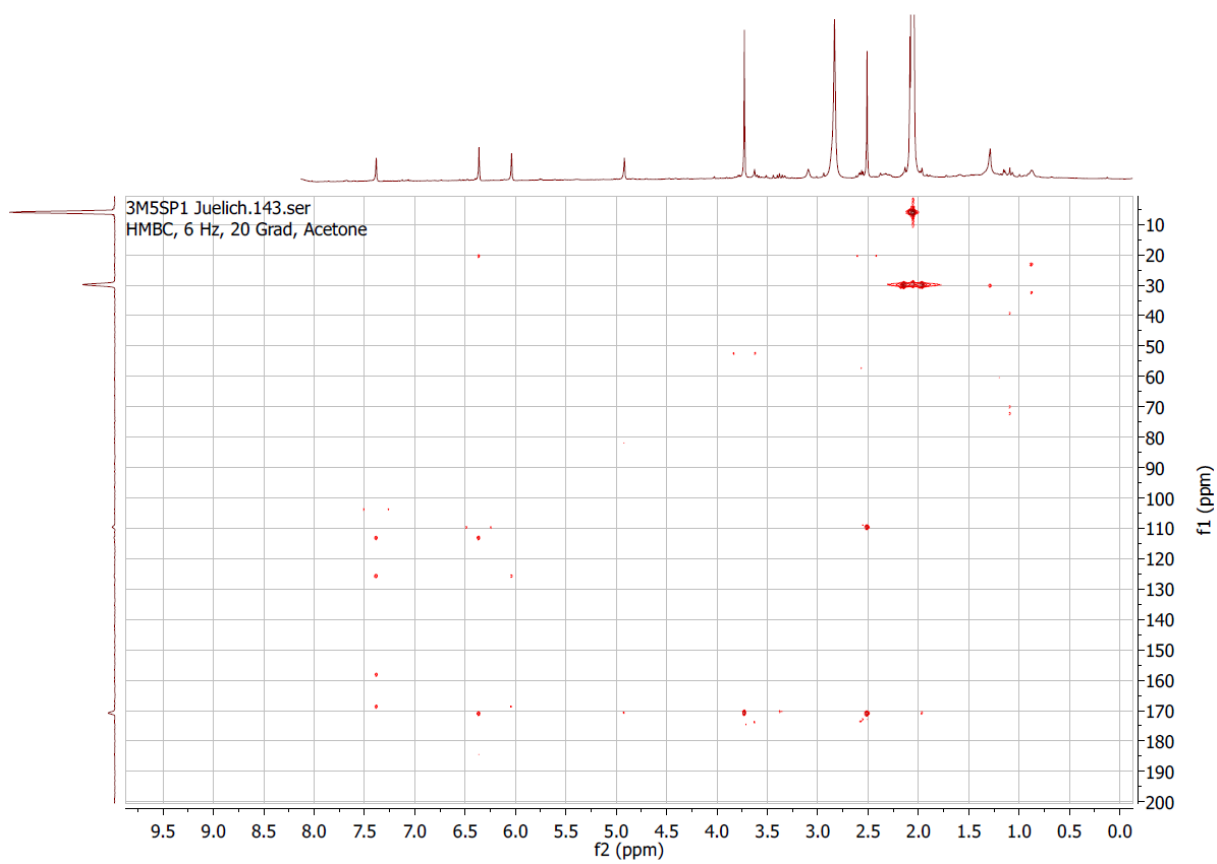

**S28.** HMBC (750 and 175 MHz, acetone- $d_6$ ) spectrum of compound **5**.
